# Supplementary material for: Assessment of turbulent viscous stress using ICOSA 4D Flow MRI for prediction of hemodynamic blood damage
Source: PubMed Central journal article supplement (PMC5177919; doi:10.1038/srep39773), 2016-12-22
Supplement: srep39773-s1.pdf [file srep39773-s1.pdf]

# **Assessment of turbulent viscous stress using ICOSA 4D Flow MRI for prediction of hemodynamic blood damage**

Hojin Ha<sup>1,2</sup>, Jonas Lantz<sup>1,2</sup>, Henrik Haraldsson<sup>3</sup>, Belen Casas<sup>1,2</sup>, Magnus Ziegler<sup>1,2</sup>, Matts Karlsson<sup>2,4</sup>, David Saloner<sup>3</sup>, Petter Dyverfeldt<sup>1,2</sup>, Tino Ebbers<sup>1,2</sup>

<sup>1</sup> Division of Cardiovascular Medicine, Department of Medical and Health Sciences, Linköping University, Linköping, Sweden.

<sup>2</sup> Center for Medical Image Science and Visualization (CMIV), Linköping University, Linköping, Sweden.

<sup>3</sup> University of California, San Francisco, San Francisco, California, United States.

<sup>4</sup> Division of Applied Thermodynamics and Fluid Mechanics, Department of Management and Engineering (IEI), Linköping University, Linköping, Sweden.

## *Supplementary information*

Corresponding Author: Hojin Ha

Phone: +46-762693607

E-mail: hojin.ha@liu.se

Running title: Assessment of turbulent viscous stress using 4D flow MRI.

Number of words: 4025 words

Number of figures: 8 figures

## Supplementary Tables

**Table S1.** Effect of voxel resolution on maximum principal shear stress of laminar viscous stress (PLVS) estimation

| Voxel resolution [mm] | $\tau_{\text{PLVS, MRI}} = a \times \tau_{\text{PLVS, CFD}} + b$ |                        |                |         | $\tau_{\text{PLVS, CFD}} - \tau_{\text{PLVS, MRI}}$<br>(Mean $\pm$ 1.96SD, $10^{-5}$ J) |
|-----------------------|------------------------------------------------------------------|------------------------|----------------|---------|-----------------------------------------------------------------------------------------|
|                       | a                                                                | b                      | R <sup>2</sup> | p-value |                                                                                         |
| 1.0                   | 0.821                                                            | $3.816 \times 10^{-7}$ | 0.962          | <0.001  | 0.054 $\pm$ 0.140                                                                       |
| 1.2                   | 0.819                                                            | $3.604 \times 10^{-7}$ | 0.083          | <0.001  | 0.056 $\pm$ 0.114                                                                       |
| 1.4                   | 0.767                                                            | $4.007 \times 10^{-7}$ | 0.980          | <0.001  | 0.079 $\pm$ 0.139                                                                       |
| 1.6                   | 0.787                                                            | $3.763 \times 10^{-7}$ | 0.980          | <0.001  | 0.072 $\pm$ 0.130                                                                       |
| 1.8                   | 0.762                                                            | $3.943 \times 10^{-7}$ | 0.976          | <0.001  | 0.082 $\pm$ 0.143                                                                       |
| 2.0                   | 0.729                                                            | $4.275 \times 10^{-7}$ | 0.975          | <0.001  | 0.096 $\pm$ 0.159                                                                       |
| 2.2                   | 0.669                                                            | $4.621 \times 10^{-7}$ | 0.938          | <0.001  | 0.123 $\pm$ 0.201                                                                       |
| 2.4                   | 0.732                                                            | $4.104 \times 10^{-7}$ | 0.969          | <0.001  | 0.096 $\pm$ 0.161                                                                       |
| 2.6                   | 0.659                                                            | $4.851 \times 10^{-7}$ | 0.938          | <0.001  | 0.126 $\pm$ 0.205                                                                       |
| 2.8                   | 0.684                                                            | $4.681 \times 10^{-7}$ | 0.957          | <0.001  | 0.115 $\pm$ 0.187                                                                       |
| 3.0                   | 0.588                                                            | $4.721 \times 10^{-7}$ | 0.866          | <0.001  | 0.164 $\pm$ 0.255                                                                       |

**Table S2.** Effect of voxel resolution on maximum principal shear stress of Reynolds shear stress (PRSS) estimation

| Voxel resolution [mm] | $\tau_{\text{PRSS, MRI}} = a \times \tau_{\text{PRSS, CFD}} + b$ |                        |                |         | $\tau_{\text{PRSS, CFD}} - \tau_{\text{PRSS, MRI}}$<br>(Mean $\pm$ 1.96SD, $10^{-3}$ J) |
|-----------------------|------------------------------------------------------------------|------------------------|----------------|---------|-----------------------------------------------------------------------------------------|
|                       | a                                                                | b                      | R <sup>2</sup> | p-value |                                                                                         |
| 1.0                   | 1.109                                                            | $9.786 \times 10^{-6}$ | 0.998          | <0.001  | -0.038 $\pm$ 0.087                                                                      |
| 1.2                   | 1.161                                                            | $1.531 \times 10^{-5}$ | 0.996          | <0.001  | -0.057 $\pm$ 0.129                                                                      |
| 1.4                   | 1.187                                                            | $1.466 \times 10^{-5}$ | 0.994          | <0.001  | -0.064 $\pm$ 0.151                                                                      |
| 1.6                   | 1.266                                                            | $2.393 \times 10^{-5}$ | 0.992          | <0.001  | -0.093 $\pm$ 0.208                                                                      |
| 1.8                   | 1.310                                                            | $3.448 \times 10^{-5}$ | 0.988          | <0.001  | -0.116 $\pm$ 0.248                                                                      |
| 2.0                   | 1.323                                                            | $3.363 \times 10^{-5}$ | 0.987          | <0.001  | -0.118 $\pm$ 0.258                                                                      |
| 2.2                   | 1.424                                                            | $4.700 \times 10^{-5}$ | 0.985          | <0.001  | -0.158 $\pm$ 0.331                                                                      |
| 2.4                   | 1.545                                                            | $3.511 \times 10^{-5}$ | 0.975          | <0.001  | -0.178 $\pm$ 0.431                                                                      |
| 2.6                   | 1.399                                                            | $7.422 \times 10^{-5}$ | 0.978          | <0.001  | -0.179 $\pm$ 0.326                                                                      |
| 2.8                   | 1.565                                                            | $7.195 \times 10^{-5}$ | 0.969          | <0.001  | -0.220 $\pm$ 0.455                                                                      |
| 3.0                   | 1.581                                                            | $6.890 \times 10^{-5}$ | 0.969          | <0.001  | -0.221 $\pm$ 0.466                                                                      |

**Table S3.** Effect of voxel resolution on turbulent viscous shear stress (TVSS) estimation

| Voxel resolution<br>[mm] | $\tau_{\text{TVSS, MRI}} = a \times \tau_{\text{TVSS, CFD}} + b$ |                        |                |         | $\tau_{\text{TVSS, CFD}} - \tau_{\text{TVSS, MRI}}$<br>(Mean $\pm$ 1.96SD, $10^{-5}$ J) |
|--------------------------|------------------------------------------------------------------|------------------------|----------------|---------|-----------------------------------------------------------------------------------------|
|                          | a                                                                | b                      | R <sup>2</sup> | p-value |                                                                                         |
| 1.0                      | 1.052                                                            | $2.224 \times 10^{-7}$ | 0.998          | <0.001  | -0.064 $\pm$ 0.107                                                                      |
| 1.2                      | 1.070                                                            | $2.661 \times 10^{-7}$ | 0.998          | <0.001  | -0.082 $\pm$ 0.130                                                                      |
| 1.4                      | 1.078                                                            | $2.886 \times 10^{-7}$ | 0.997          | <0.001  | -0.091 $\pm$ 0.144                                                                      |
| 1.6                      | 1.092                                                            | $3.420 \times 10^{-7}$ | 0.997          | <0.001  | -0.108 $\pm$ 0.165                                                                      |
| 1.8                      | 1.093                                                            | $4.074 \times 10^{-7}$ | 0.996          | <0.001  | -0.115 $\pm$ 0.175                                                                      |
| 2.0                      | 1.114                                                            | $3.613 \times 10^{-7}$ | 0.997          | <0.001  | -0.127 $\pm$ 0.192                                                                      |
| 2.2                      | 1.121                                                            | $4.767 \times 10^{-7}$ | 0.996          | <0.001  | -0.144 $\pm$ 0.212                                                                      |
| 2.4                      | 1.142                                                            | $4.384 \times 10^{-7}$ | 0.993          | <0.001  | -0.157 $\pm$ 0.257                                                                      |
| 2.6                      | 1.091                                                            | $6.034 \times 10^{-7}$ | 0.992          | <0.001  | -0.133 $\pm$ 0.197                                                                      |
| 2.8                      | 1.106                                                            | $7.192 \times 10^{-7}$ | 0.990          | <0.001  | -0.157 $\pm$ 0.227                                                                      |
| 3.0                      | 1.186                                                            | $4.576 \times 10^{-7}$ | 0.995          | <0.001  | -0.194 $\pm$ 0.305                                                                      |

**Table S4.** Effect of SNR on fluid-dynamic stress quantification

| Reynolds number | SNR | PLVS  |       | PRSS   |       | TVSS   |       | Square sum of TVSS |       |
|-----------------|-----|-------|-------|--------|-------|--------|-------|--------------------|-------|
|                 |     | mean  | SD    | mean   | SD    | mean   | SD    | mean               | SD    |
| 2000            | Inf | 1.000 | 0.000 | 1.000  | 0.000 | 1.000  | 0.000 | 1.000              | 0.000 |
| 2000            | 80  | 1.018 | 0.000 | 1.564  | 0.001 | 1.448  | 0.003 | 1.002              | 0.004 |
| 2000            | 40  | 1.054 | 0.000 | 2.279  | 0.002 | 1.750  | 0.005 | 0.997              | 0.006 |
| 2000            | 20  | 1.159 | 0.000 | 3.807  | 0.003 | 2.302  | 0.012 | 1.000              | 0.020 |
| 2000            | 10  | 1.444 | 0.002 | 7.006  | 0.011 | 3.353  | 0.012 | 1.015              | 0.046 |
| 2000            | 7   | 1.737 | 0.003 | 9.806  | 0.016 | 4.266  | 0.021 | 1.001              | 0.078 |
| 2000            | 5   | 2.166 | 0.004 | 13.573 | 0.027 | 5.526  | 0.023 | 0.979              | 0.125 |
| 2000            | 4   | 2.563 | 0.003 | 16.895 | 0.019 | 6.664  | 0.024 | 1.018              | 0.134 |
| 2000            | 3   | 3.247 | 0.004 | 22.478 | 0.031 | 8.584  | 0.037 | 0.967              | 0.286 |
| 2000            | 2   | 4.663 | 0.006 | 33.723 | 0.039 | 12.521 | 0.067 | 0.923              | 0.642 |
| 3000            | Inf | 1.000 | 0.000 | 1.000  | 0.000 | 1.000  | 0.000 | 1.000              | 0.000 |
| 3000            | 80  | 1.012 | 0.000 | 1.733  | 0.001 | 1.468  | 0.004 | 1.001              | 0.003 |
| 3000            | 40  | 1.043 | 0.000 | 2.644  | 0.002 | 1.776  | 0.006 | 1.003              | 0.007 |
| 3000            | 20  | 1.138 | 0.001 | 4.572  | 0.007 | 2.307  | 0.011 | 0.998              | 0.018 |
| 3000            | 10  | 1.414 | 0.002 | 8.574  | 0.007 | 3.339  | 0.015 | 0.999              | 0.035 |
| 3000            | 7   | 1.704 | 0.002 | 12.060 | 0.012 | 4.265  | 0.023 | 1.001              | 0.052 |
| 3000            | 5   | 2.133 | 0.002 | 16.739 | 0.019 | 5.541  | 0.022 | 1.022              | 0.100 |
| 3000            | 4   | 2.531 | 0.003 | 20.859 | 0.023 | 6.677  | 0.044 | 0.978              | 0.203 |
| 3000            | 3   | 3.219 | 0.006 | 27.793 | 0.041 | 8.646  | 0.044 | 1.101              | 0.264 |
| 3000            | 2   | 4.642 | 0.005 | 41.649 | 0.068 | 12.591 | 0.066 | 0.918              | 0.547 |
| 4000            | Inf | 1.000 | 0.000 | 1.000  | 0.000 | 1.000  | 0.000 | 1.000              | 0.000 |
| 4000            | 80  | 1.025 | 0.000 | 1.709  | 0.002 | 1.313  | 0.003 | 0.999              | 0.005 |
| 4000            | 40  | 1.072 | 0.000 | 2.636  | 0.003 | 1.581  | 0.005 | 1.002              | 0.004 |
| 4000            | 20  | 1.202 | 0.001 | 4.629  | 0.006 | 2.067  | 0.009 | 0.998              | 0.014 |
| 4000            | 10  | 1.545 | 0.001 | 8.767  | 0.008 | 3.037  | 0.017 | 1.011              | 0.040 |
| 4000            | 7   | 1.897 | 0.003 | 12.374 | 0.012 | 3.899  | 0.024 | 1.020              | 0.061 |
| 4000            | 5   | 2.407 | 0.003 | 17.220 | 0.024 | 5.098  | 0.017 | 1.035              | 0.101 |
| 4000            | 4   | 2.878 | 0.004 | 21.473 | 0.027 | 6.164  | 0.025 | 0.962              | 0.160 |
| 4000            | 3   | 3.692 | 0.005 | 28.604 | 0.028 | 8.005  | 0.034 | 0.995              | 0.257 |
| 4000            | 2   | 5.358 | 0.007 | 42.929 | 0.037 | 11.737 | 0.046 | 1.232              | 0.468 |
| 5000            | Inf | 1.000 | 0.000 | 1.000  | 0.000 | 1.000  | 0.000 | 1.000              | 0.000 |
| 5000            | 80  | 1.027 | 0.000 | 1.725  | 0.002 | 1.357  | 0.004 | 1.000              | 0.003 |
| 5000            | 40  | 1.078 | 0.000 | 2.652  | 0.003 | 1.657  | 0.004 | 0.998              | 0.005 |
| 5000            | 20  | 1.214 | 0.001 | 4.635  | 0.008 | 2.207  | 0.005 | 1.002              | 0.010 |
| 5000            | 10  | 1.573 | 0.001 | 8.740  | 0.015 | 3.277  | 0.014 | 0.983              | 0.025 |
| 5000            | 7   | 1.938 | 0.002 | 12.327 | 0.011 | 4.237  | 0.009 | 1.007              | 0.033 |
| 5000            | 5   | 2.467 | 0.003 | 17.136 | 0.021 | 5.559  | 0.020 | 1.034              | 0.074 |
| 5000            | 4   | 2.956 | 0.004 | 21.355 | 0.012 | 6.732  | 0.029 | 0.991              | 0.127 |
| 5000            | 3   | 3.792 | 0.005 | 28.417 | 0.039 | 8.744  | 0.023 | 1.051              | 0.156 |
| 5000            | 2   | 5.514 | 0.008 | 42.688 | 0.041 | 12.792 | 0.072 | 0.789              | 0.663 |
| 6000            | Inf | 1.000 | 0.000 | 1.000  | 0.000 | 1.000  | 0.000 | 1.000              | 0.000 |
| 6000            | 80  | 1.027 | 0.000 | 1.763  | 0.001 | 1.370  | 0.004 | 1.001              | 0.003 |
| 6000            | 40  | 1.079 | 0.000 | 2.736  | 0.003 | 1.676  | 0.003 | 1.002              | 0.006 |
| 6000            | 20  | 1.215 | 0.001 | 4.809  | 0.003 | 2.228  | 0.013 | 1.002              | 0.020 |
| 6000            | 10  | 1.575 | 0.002 | 9.114  | 0.009 | 3.311  | 0.016 | 0.996              | 0.028 |
| 6000            | 7   | 1.940 | 0.003 | 12.865 | 0.013 | 4.283  | 0.022 | 0.995              | 0.058 |
| 6000            | 5   | 2.471 | 0.004 | 17.884 | 0.021 | 5.591  | 0.021 | 0.892              | 0.086 |
| 6000            | 4   | 2.958 | 0.004 | 22.303 | 0.034 | 6.804  | 0.033 | 1.008              | 0.134 |
| 6000            | 3   | 3.795 | 0.005 | 29.730 | 0.046 | 8.861  | 0.046 | 1.142              | 0.278 |
| 6000            | 2   | 5.516 | 0.006 | 44.599 | 0.053 | 12.964 | 0.055 | 0.997              | 0.439 |

**Table S5.** Effect of SNR on BDI quantification

| Severity | Reynolds number | SNR | Normalized BDI | Standard deviation |
|----------|-----------------|-----|----------------|--------------------|
| 75       | 2000            | Inf | 1.000          | 0.000              |
| 75       | 2000            | 80  | 0.997          | 0.017              |
| 75       | 2000            | 40  | 0.989          | 0.013              |
| 75       | 2000            | 20  | 0.932          | 0.033              |
| 75       | 2000            | 10  | 0.815          | 0.062              |
| 75       | 2000            | 7   | 0.769          | 0.135              |
| 75       | 2000            | 5   | 0.666          | 0.148              |
| 75       | 2000            | 4   | 0.534          | 0.614              |
| 75       | 2000            | 3   | 0.679          | 0.714              |
| 75       | 2000            | 2   | -0.234         | 2.239              |
| 75       | 3000            | Inf | 1.000          | 0.000              |
| 75       | 3000            | 80  | 0.993          | 0.009              |
| 75       | 3000            | 40  | 0.971          | 0.021              |
| 75       | 3000            | 20  | 0.921          | 0.040              |
| 75       | 3000            | 10  | 0.820          | 0.035              |
| 75       | 3000            | 7   | 0.750          | 0.101              |
| 75       | 3000            | 5   | 0.705          | 0.128              |
| 75       | 3000            | 4   | 0.492          | 0.257              |
| 75       | 3000            | 3   | 0.853          | 0.564              |
| 75       | 3000            | 2   | 0.544          | 1.555              |
| 75       | 4000            | Inf | 1.000          | 0.000              |
| 75       | 4000            | 80  | 0.980          | 0.010              |
| 75       | 4000            | 40  | 0.959          | 0.023              |
| 75       | 4000            | 20  | 0.887          | 0.027              |
| 75       | 4000            | 10  | 0.814          | 0.066              |
| 75       | 4000            | 7   | 0.729          | 0.135              |
| 75       | 4000            | 5   | 0.662          | 0.123              |
| 75       | 4000            | 4   | 0.655          | 0.509              |
| 75       | 4000            | 3   | 0.467          | 0.795              |
| 75       | 4000            | 2   | 1.789          | 1.657              |
| 75       | 5000            | Inf | 1.000          | 0.000              |
| 75       | 5000            | 80  | 0.983          | 0.011              |
| 75       | 5000            | 40  | 0.954          | 0.019              |
| 75       | 5000            | 20  | 0.910          | 0.044              |
| 75       | 5000            | 10  | 0.763          | 0.057              |
| 75       | 5000            | 7   | 0.712          | 0.097              |
| 75       | 5000            | 5   | 0.715          | 0.125              |
| 75       | 5000            | 4   | 0.412          | 0.624              |
| 75       | 5000            | 3   | 0.741          | 0.865              |
| 75       | 5000            | 2   | 1.778          | 2.100              |
| 75       | 6000            | Inf | 1.000          | 0.000              |
| 75       | 6000            | 80  | 0.988          | 0.013              |
| 75       | 6000            | 40  | 0.955          | 0.030              |
| 75       | 6000            | 20  | 0.891          | 0.047              |
| 75       | 6000            | 10  | 0.781          | 0.063              |
| 75       | 6000            | 7   | 0.650          | 0.091              |
| 75       | 6000            | 5   | 0.471          | 0.309              |
| 75       | 6000            | 4   | 0.631          | 0.429              |
| 75       | 6000            | 3   | 0.607          | 0.896              |
| 75       | 6000            | 2   | 0.249          | 1.709              |

**Table S6.** Geometry and flow conditions for the numerical simulation and 4D Flow MRI simulation

| Severity <sup>a</sup> (%) | PSD <sup>b</sup> | Reynolds number |
|---------------------------|------------------|-----------------|
| 60                        | -                | 1000            |
| 60                        | -                | 2000            |
| 60                        | -                | 3000            |
| 75                        | -                | 1000            |
| 75                        | -                | 2000            |
| 75                        | -                | 3000            |
| 75                        | -                | 4000            |
| 75                        | -                | 5000            |
| 75                        | -                | 6000            |
| 90                        | -                | 500             |
| 90                        | -                | 1000            |
| 90                        | -                | 2000            |
| 90                        | -                | 3000            |
| 90                        | -                | 4000            |
| 90                        | -                | 5000            |
| 90                        | -                | 6000            |
| 75                        | 2D               | 1000            |
| 75                        | 2D               | 2000            |
| 75                        | 2D               | 3000            |
| 75                        | 2D               | 4000            |
| 75                        | 2D               | 5000            |
| 75                        | 2D               | 6000            |

<sup>a</sup>Severity is the percentage of area reduction at the stenosis apex.

<sup>b</sup>Post-stenotic dilatation (PSD), defined as a ratio between a diameter at the post-stenosis and upstream diameter.

**Table S7.** Flow encoding scheme with ICOSA6 sequence

| Number of encoding | Conventional 4D flow MRI | ICOSA encoding                                          |
|--------------------|--------------------------|---------------------------------------------------------|
| 0                  | 0                        | 0                                                       |
| 1                  | $\Delta M_1(x)$          | $\Delta M_1(\cos\theta^b \cdot x + \sin\theta \cdot y)$ |
| 2                  | $\Delta M_1(y)$          | $\Delta M_1(\cos\theta \cdot x - \sin\theta \cdot y)$   |
| 3                  | $\Delta M_1(z)$          | $\Delta M_1(\cos\theta \cdot y + \sin\theta \cdot z)$   |
| 4                  | NA <sup>a</sup>          | $\Delta M_1(\cos\theta \cdot y - \sin\theta \cdot z)$   |
| 5                  | NA                       | $\Delta M_1(\sin\theta \cdot x + \cos\theta \cdot z)$   |
| 6                  | NA                       | $\Delta M_1(\sin\theta \cdot x - \cos\theta \cdot z)$   |

<sup>a</sup>NA; not-applicable, <sup>b</sup> $\theta$  for the present study is about  $31.17^\circ$ , which corresponds to  $\cos\theta = 0.8507$  and  $\sin\theta = 0.5257$



**Table S8.** Velocity and intravoxel turbulence parameters from ICOSA6 sequence

| Number of encoding | Velocity component                              | Intravoxel standard deviation                                                                                                                         |
|--------------------|-------------------------------------------------|-------------------------------------------------------------------------------------------------------------------------------------------------------|
| 1                  | $V_1 = \cos\theta \cdot u + \sin\theta \cdot v$ | $\sigma_1^2 = \cos^2\theta \cdot (\sigma_x^2) + \sin^2\theta \cdot (\sigma_y^2) + 2 \cdot (\cos\theta) \cdot (\sin\theta) \cdot \langle u'v' \rangle$ |
| 2                  | $V_2 = \cos\theta \cdot u - \sin\theta \cdot v$ | $\sigma_2^2 = \cos^2\theta \cdot (\sigma_x^2) + \sin^2\theta \cdot (\sigma_y^2) - 2 \cdot (\cos\theta) \cdot (\sin\theta) \cdot \langle u'v' \rangle$ |
| 3                  | $V_3 = \cos\theta \cdot v + \sin\theta \cdot w$ | $\sigma_3^2 = \cos^2\theta \cdot (\sigma_y^2) + \sin^2\theta \cdot (\sigma_z^2) + 2 \cdot (\cos\theta) \cdot (\sin\theta) \cdot \langle v'w' \rangle$ |
| 4                  | $V_4 = \cos\theta \cdot v - \sin\theta \cdot w$ | $\sigma_4^2 = \cos^2\theta \cdot (\sigma_y^2) + \sin^2\theta \cdot (\sigma_z^2) - 2 \cdot (\cos\theta) \cdot (\sin\theta) \cdot \langle v'w' \rangle$ |
| 5                  | $V_5 = \sin\theta \cdot u + \cos\theta \cdot w$ | $\sigma_5^2 = \sin^2\theta \cdot (\sigma_x^2) + \cos^2\theta \cdot (\sigma_z^2) + 2 \cdot (\cos\theta) \cdot (\sin\theta) \cdot \langle u'w' \rangle$ |
| 6                  | $V_6 = \sin\theta \cdot u - \cos\theta \cdot w$ | $\sigma_6^2 = \sin^2\theta \cdot (\sigma_x^2) - \cos^2\theta \cdot (\sigma_z^2) + 2 \cdot (\cos\theta) \cdot (\sin\theta) \cdot \langle u'w' \rangle$ |

\* u, v and w indicate the velocity component in three orthogonal directions along x, y, and z.

\*\*  $\langle u'v' \rangle$ ,  $\langle v'w' \rangle$  and  $\langle u'w' \rangle$  indicate the Reynolds stress component

## Supplementary Figures

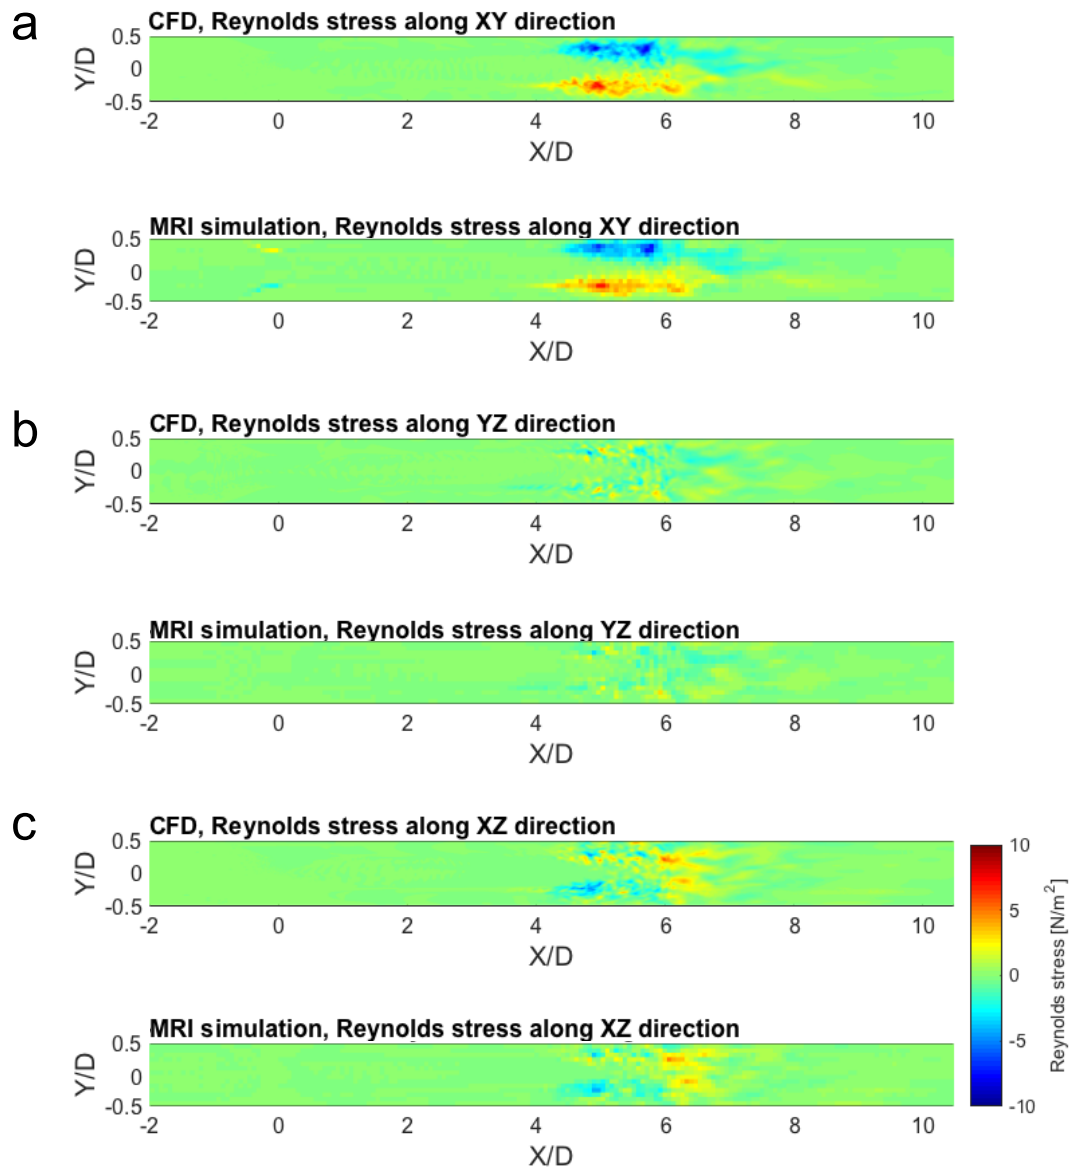

**Figure S1.** Comparison of Reynolds stress with CFD at the XY measurement plane (75% stenosis with  $\text{Re} = 2000$ ). (a) Reynolds stress component along XY direction ( $-\rho\overline{u'v'}$ ), (a) Reynolds stress component along YZ direction ( $-\rho\overline{v'w'}$ ) and (c) (a) Reynolds stress component along XZ direction ( $-\rho\overline{u'w'}$ ), where  $u'$ ,  $v'$  and  $w'$  are velocity fluctuation along X, Y and Z axis, respectively. X and Y are normalized by the upstream diameter ( $D = 14.6$  mm). Principal flow direction is toward the positive X direction. The voxel size for MRI simulation was set to 1 mm. Note that the figure only shows the XY directional components because those are identical with the XZ directional components due to the symmetry of stenosis channel.

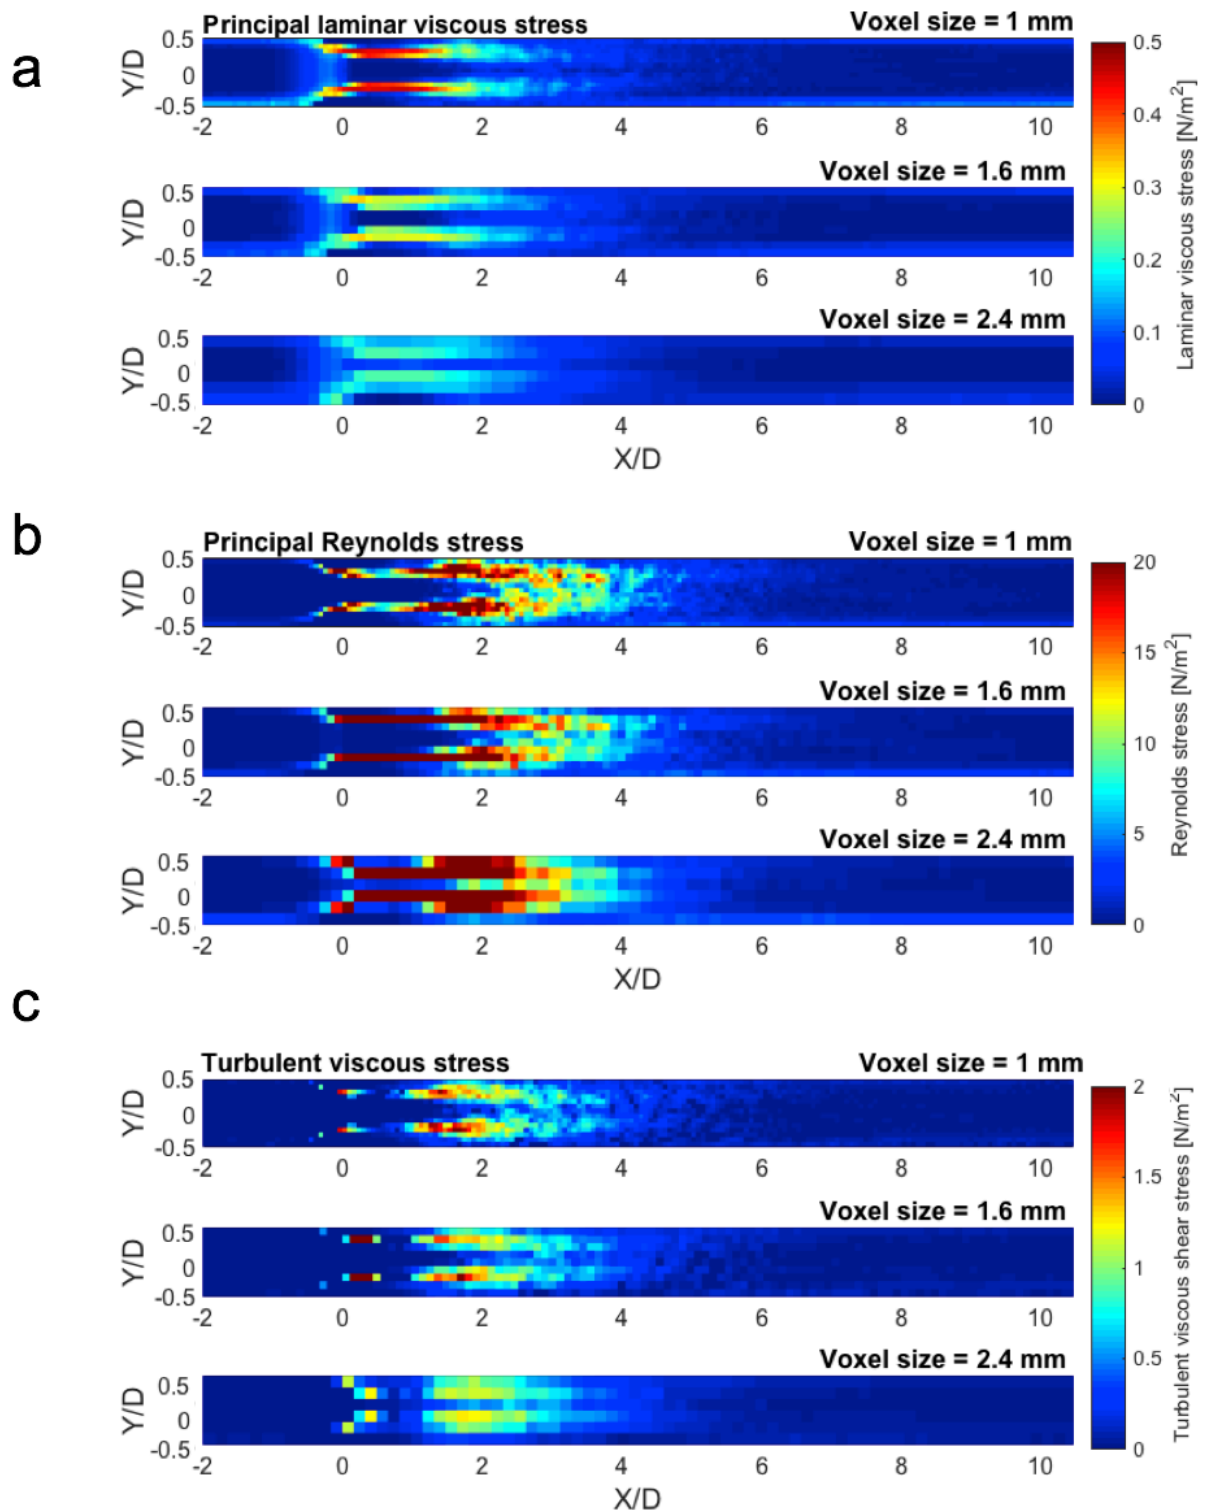

**Figure S2.** Effect of voxel resolution on (a) PLVS, (b) PRSS and (c) TVSS. Results shows MRI simulation with the voxel size of 1 mm, 1.6 mm and 2.4 mm at 75% stenosis with  $\text{Re} = 4000$ . Principal flow direction is toward the positive X direction.

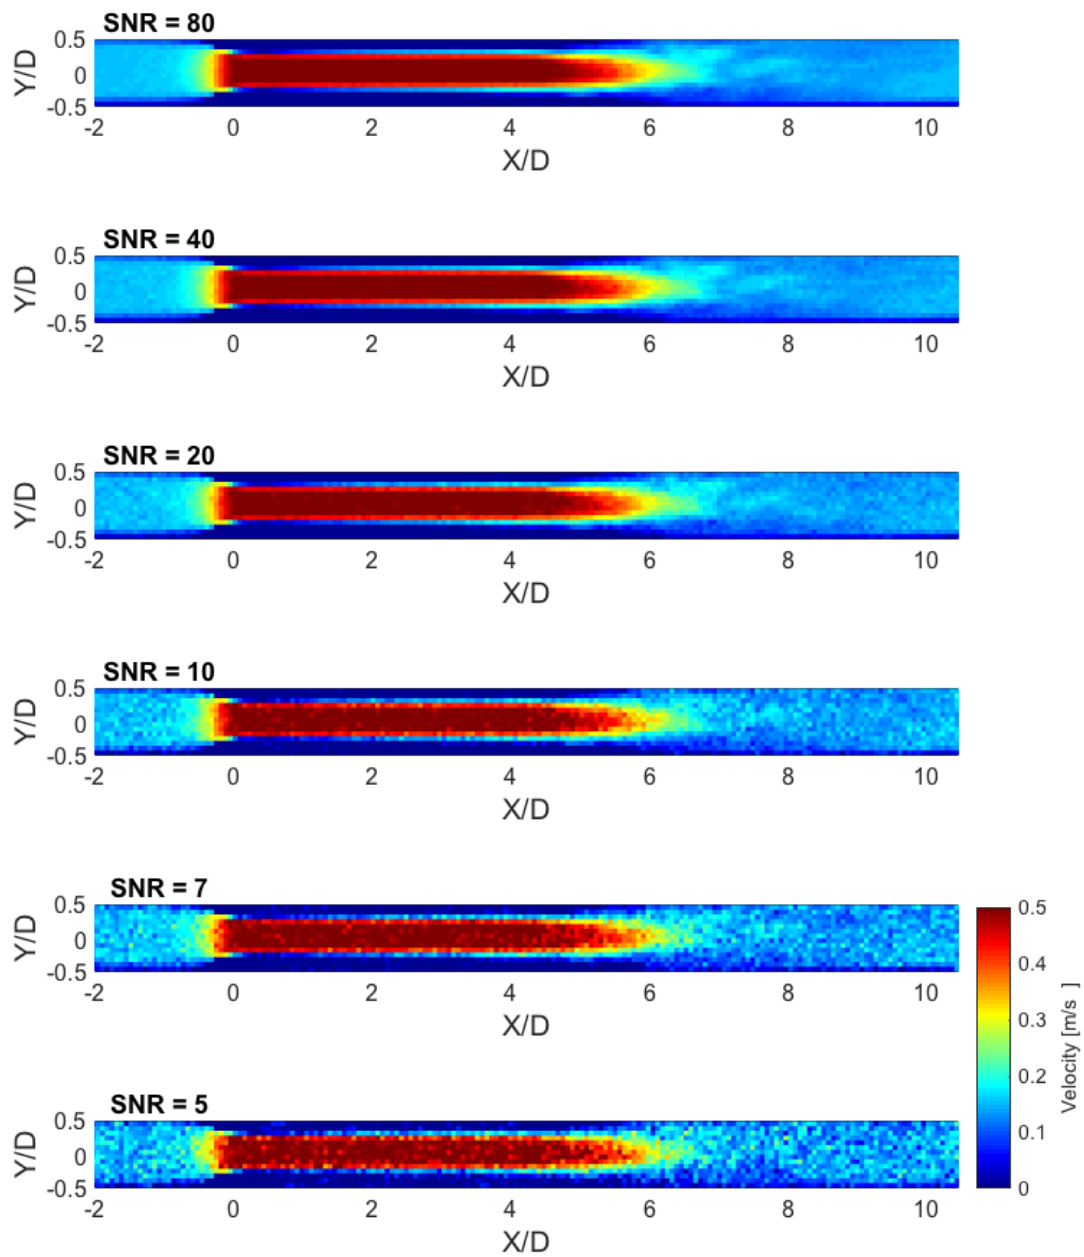

**Figure S3.** Effect of SNR on the time-averaged velocity field at 75% stenosis with  $Re = 2000$ .  $X$  and  $Y$  are normalized by the upstream diameter ( $D = 14.6$  mm). Principal flow direction is toward the positive  $X$  direction. The voxel size for MRI simulation was set to 1 mm.

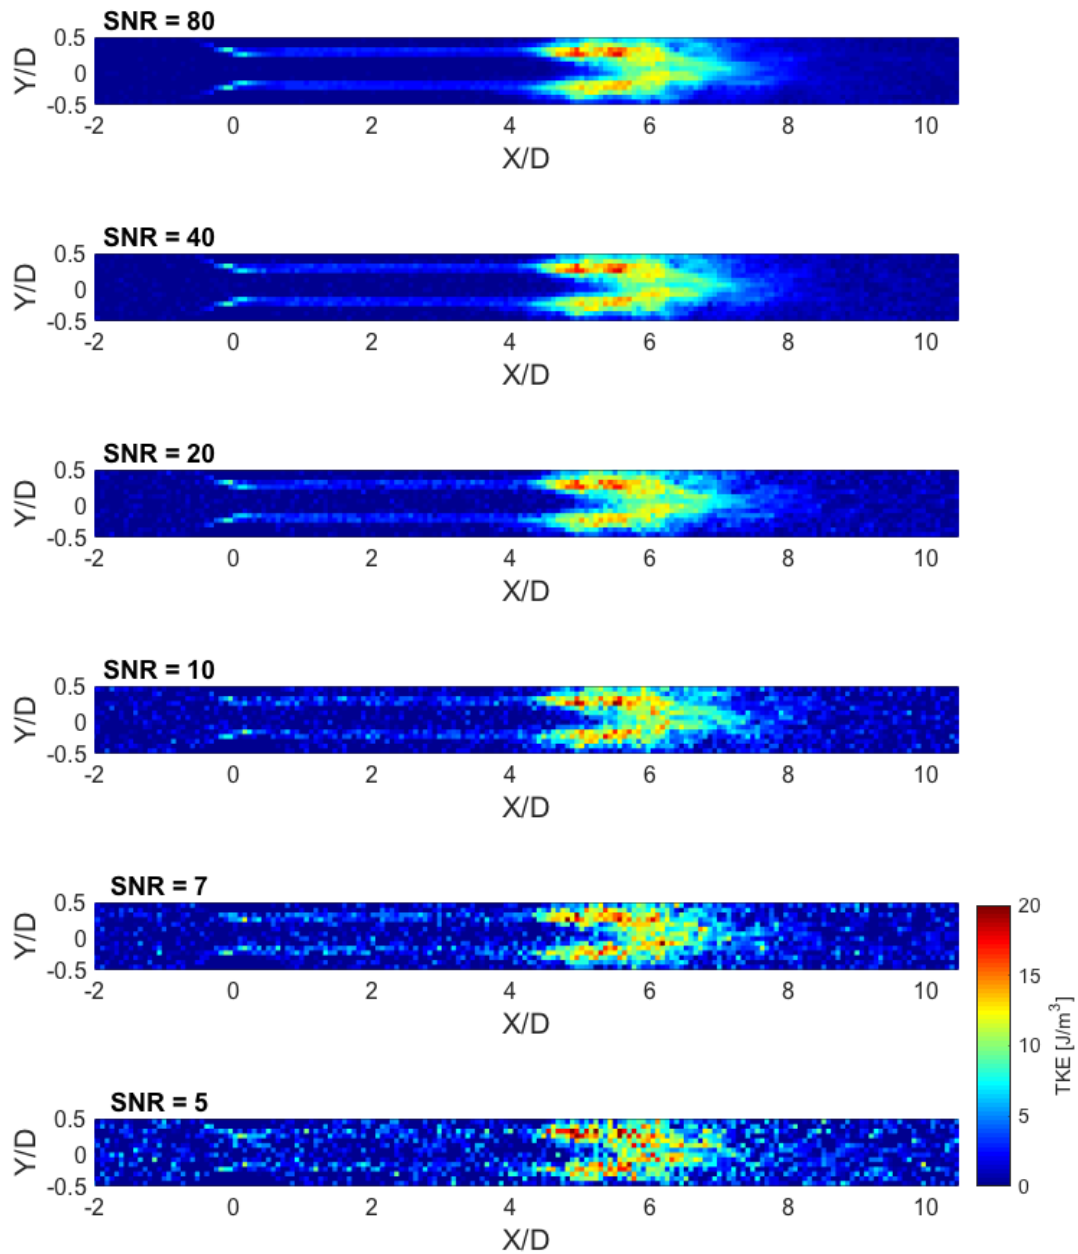

**Figure S4.** Effect of SNR on TKE field at 75% stenosis with  $Re = 2000$ .  $X$  and  $Y$  are normalized by the upstream diameter ( $D = 14.6$  mm). Principal flow direction is toward the positive  $X$  direction. The voxel size for MRI simulation was set to 1 mm.

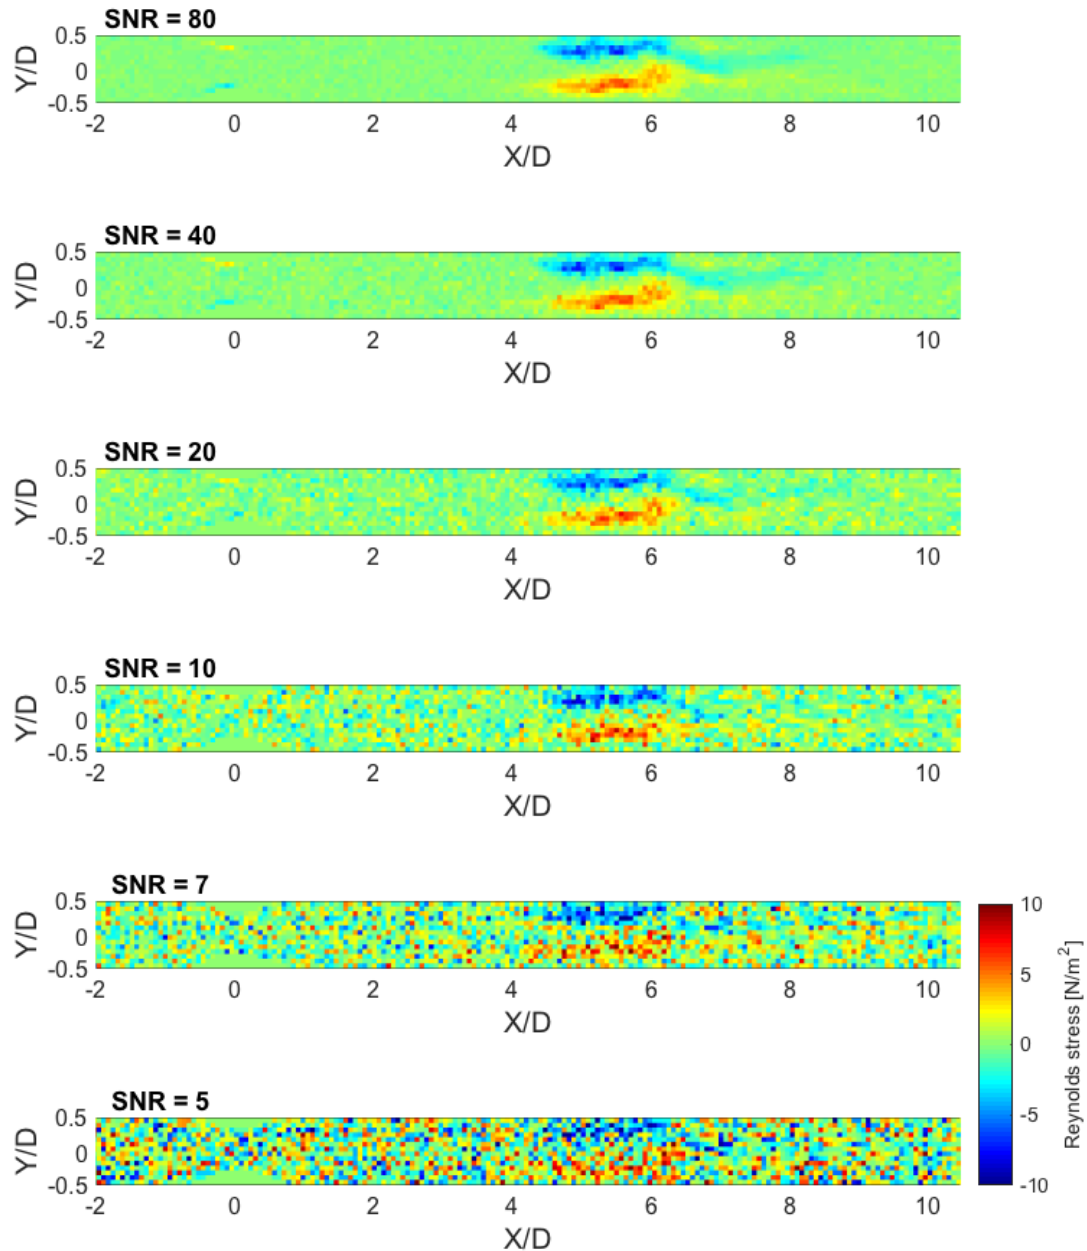

**Figure S5.** Effect of SNR on Reynolds stress along XY direction at 75% stenosis with  $Re = 2000$ . Reynolds stress component along XY direction indicates  $-\rho\overline{u'v'}$  where  $u'$  and  $v'$  are velocity fluctuation along X and Y axis, respectively. X and Y are normalized by the upstream diameter ( $D = 14.6$  mm). Principal flow direction is toward the positive X direction. The voxel size for MRI simulation was set to 1 mm.

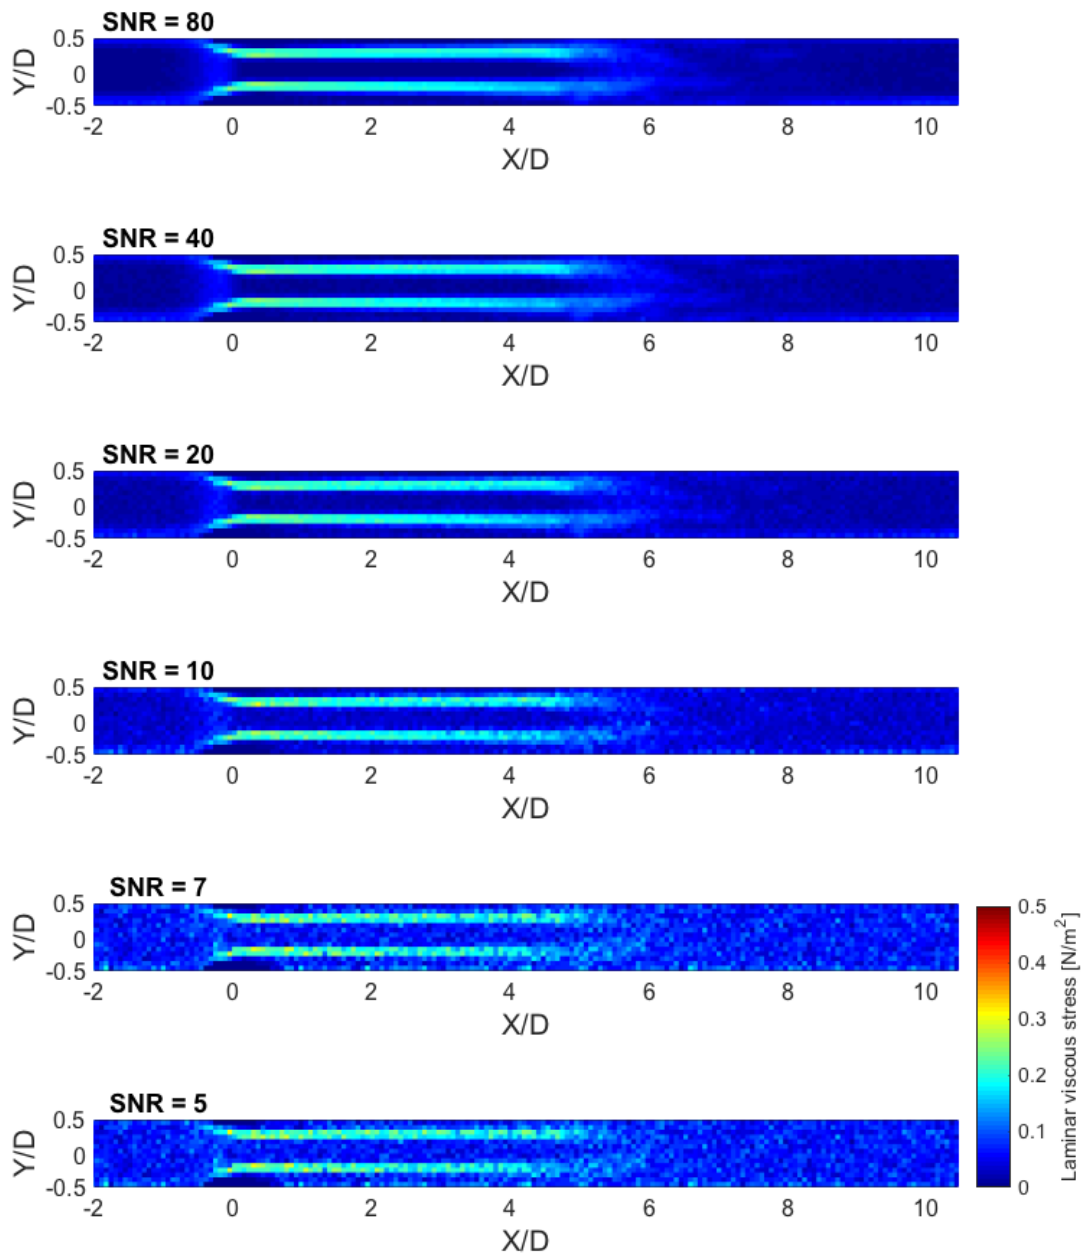

**Figure S6.** Effect of SNR on PLVS at 75% stenosis with  $Re = 2000$ .  $X$  and  $Y$  are normalized by the upstream diameter ( $D = 14.6$  mm). Principal flow direction is toward the positive  $X$  direction. The voxel size for MRI simulation was set to 1 mm.

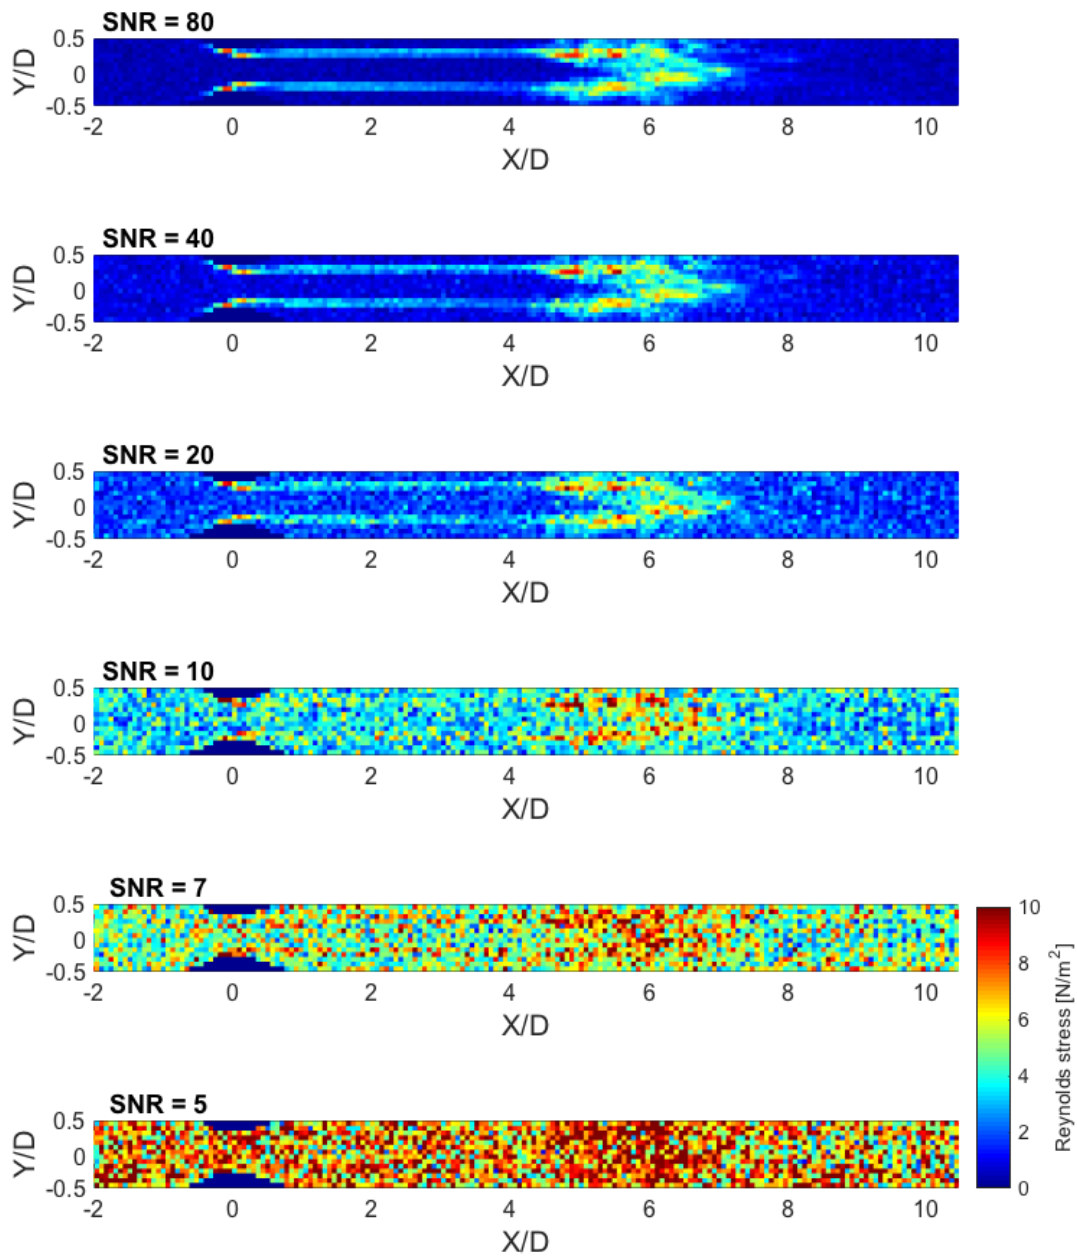

**Figure S7.** Effect of SNR on PRSS at 75% stenosis with  $Re = 2000$ .  $X$  and  $Y$  are normalized by the upstream diameter ( $D = 14.6$  mm). Principal flow direction is toward the positive  $X$  direction. The voxel size for MRI simulation was set to 1 mm.



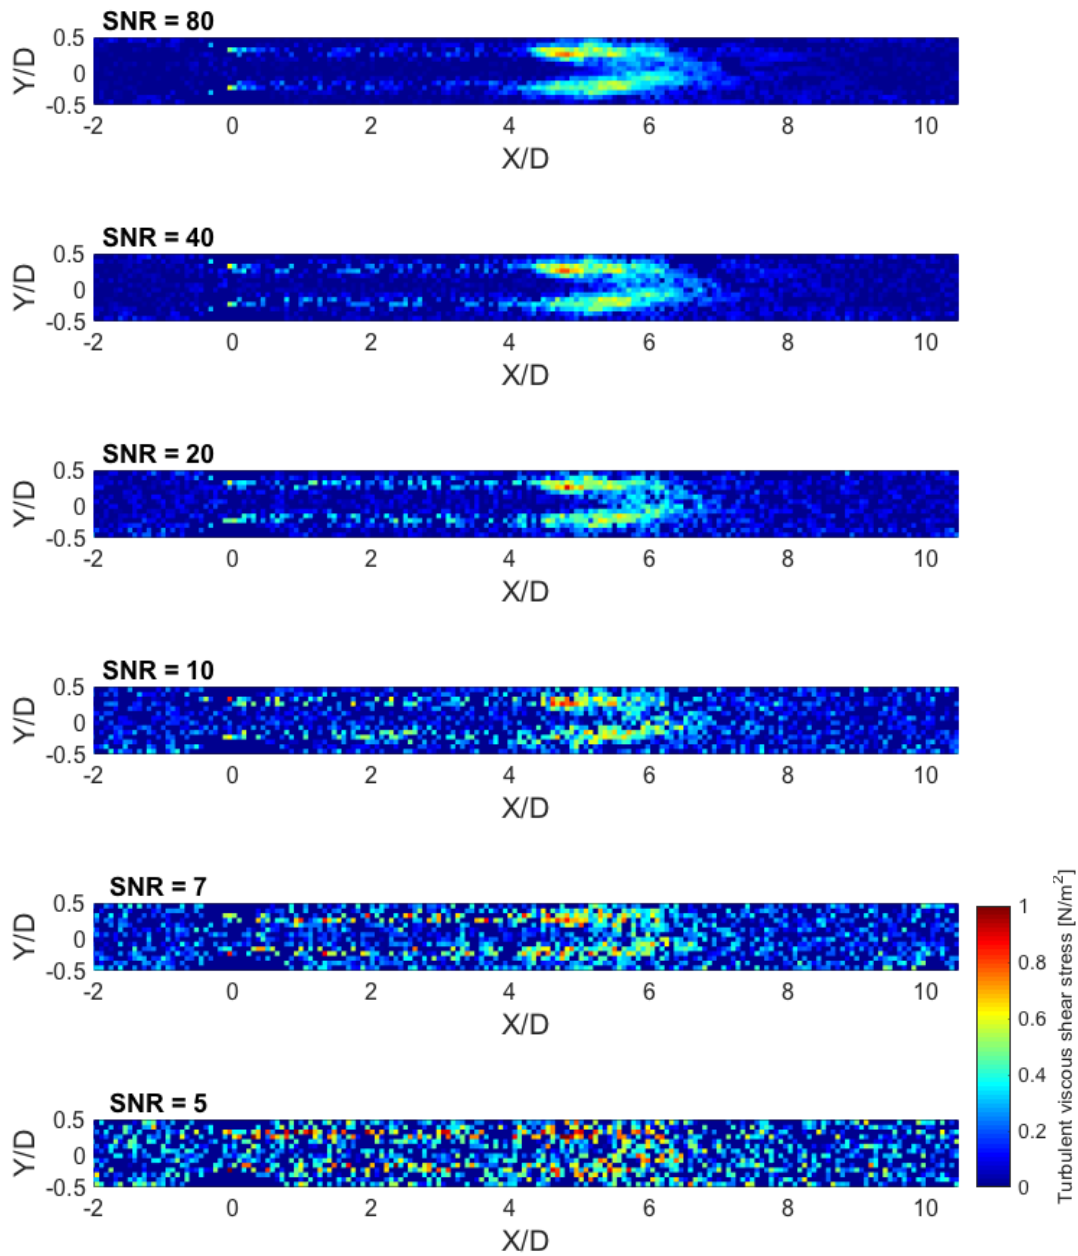

**Figure S8.** Effect of SNR on TVSS at 75% stenosis with  $Re = 2000$ . X and Y are normalized by the upstream diameter ( $D = 14.6$  mm). Principal flow direction is toward the positive X direction. The voxel size for MRI simulation was set to 1 mm.

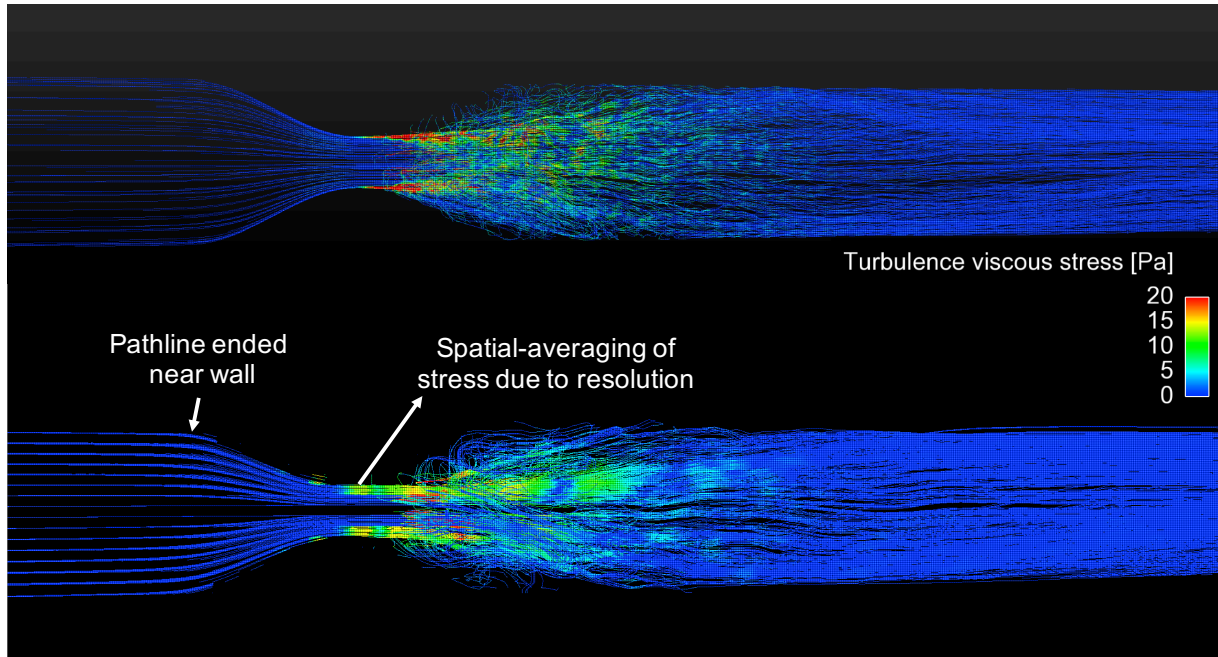

**Figure S9.** Pathlines flow visualization at 90% stenosis with  $Re = 6000$  obtained from CFD (upper panel) and 4D Flow MRI simulation (lower panel). Pathlines were colored by TVSS. Note that turbulent viscous stress in 90% stenosis with  $Re = 6000$  is mostly focused on thin layer near the stenosis apex. In contrary to the volumetric integration of stress, BDI estimation with MRI at 90% with  $Re = 6000$  could be underestimated because the spatial-averaging of stress values due to the limited resolution influences the stress-history in BDI estimation.

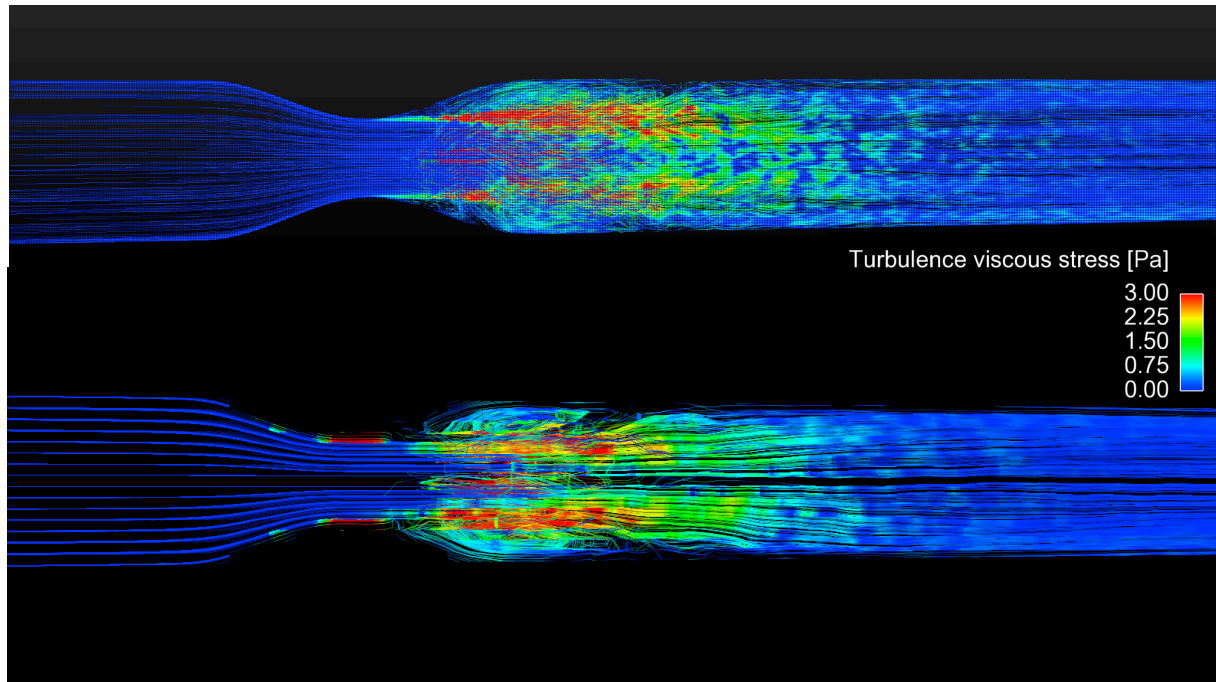

**Figure S10.** Pathlines flow visualization at 75% stenosis with  $Re = 6000$  obtained from CFD (upper panel) and 4D Flow MRI simulation (lower panel). Pathlines were colored by TVSS. In contrary to 90% stenosis, BDI estimation with MRI for 75% stenosis can be relatively free from the underestimation because turbulent viscous stress is distributed within relatively wider layer at the post-stenosis. High turbulent viscous stress at the stenosis apex was caused by the partial volume effect.

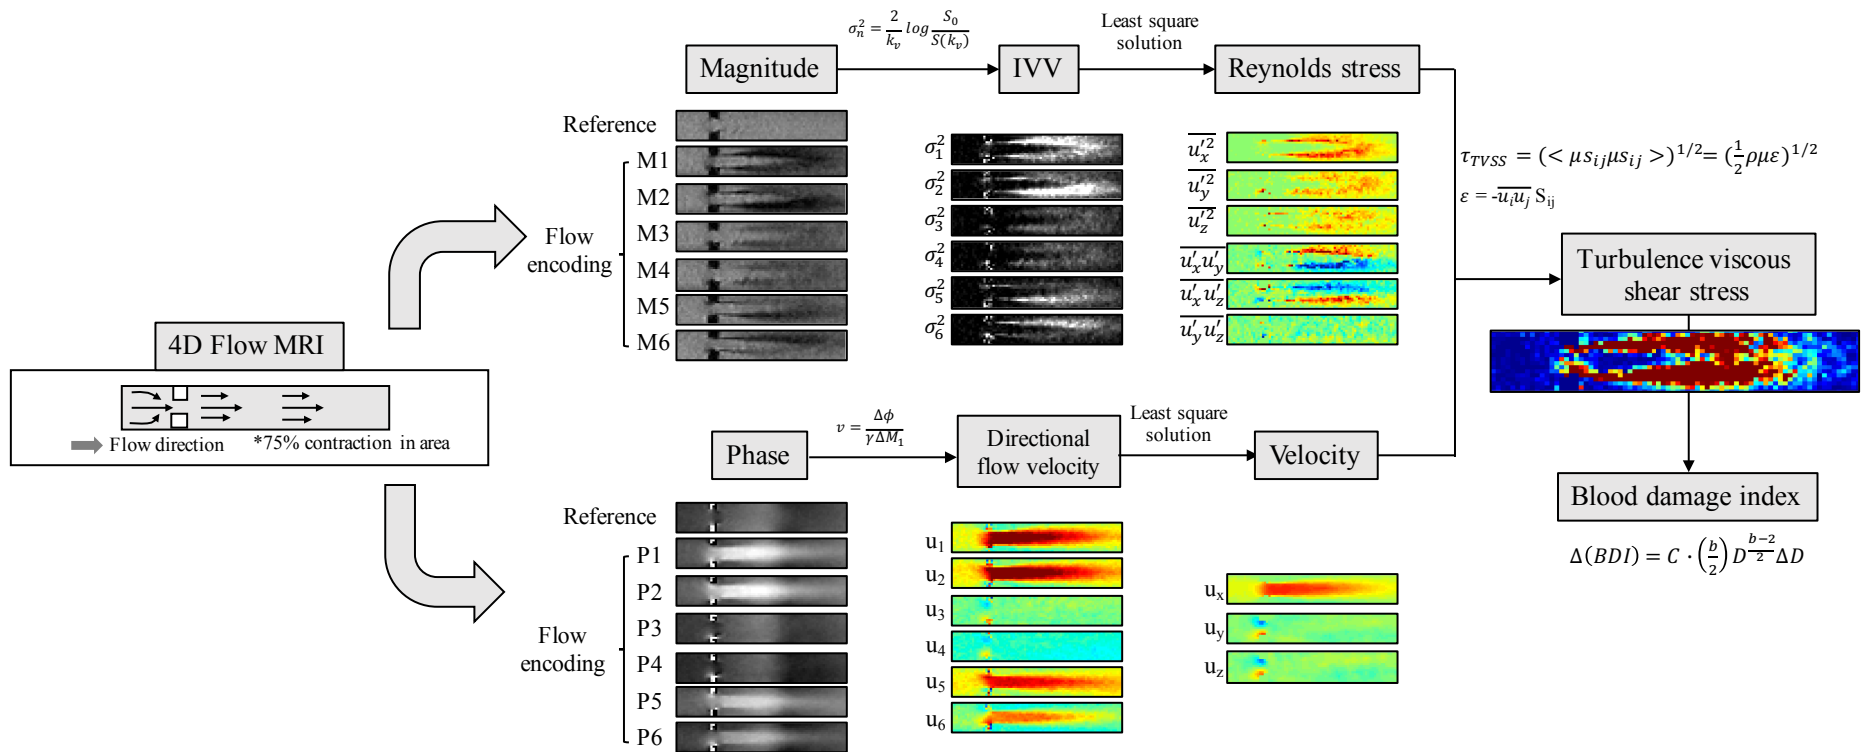

**Figure S11.** In-vitro demonstration of 4D Flow MRI with ICOSA encoding at  $Re \approx 2000$ . The inset in 4D flow MRI shows the geometry of 75% constriction model for the experimental demonstration. IVV indicates the intravoxel variance, which is the square of the intravoxel standard deviation.

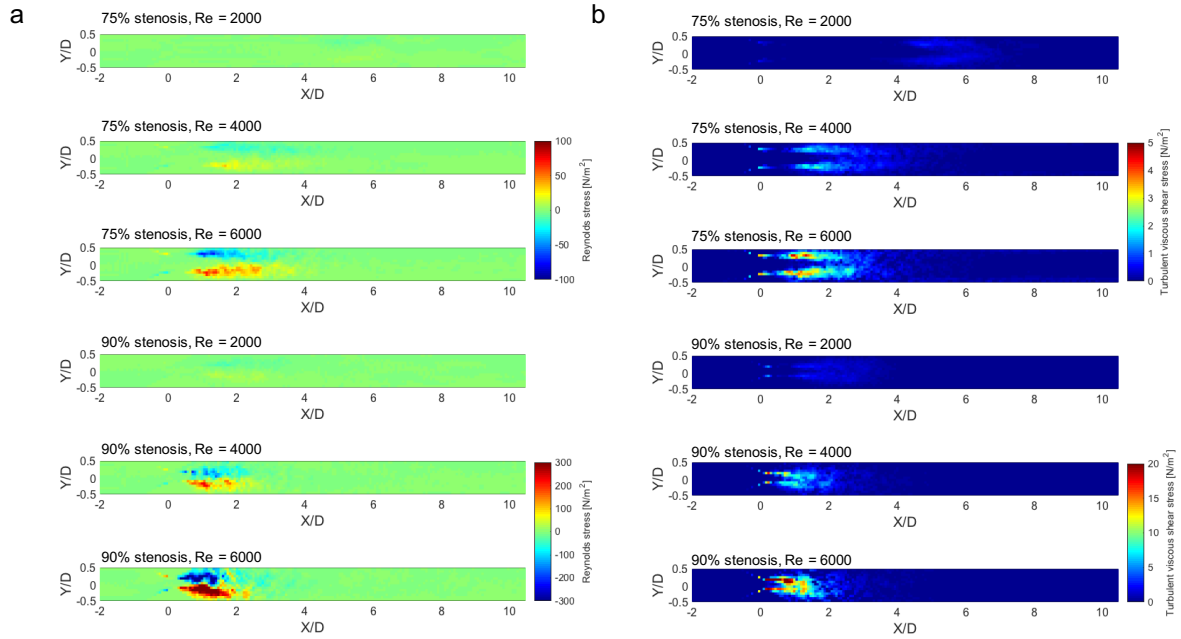

**Figure S12.** Comparison of Reynolds stress and TVSS at various Re and stenosis severity (75% and 90% in area). (a) Reynolds stress component along XY direction ( $-\rho \overline{u'v'}$ ).  $u'$  and  $v'$  are velocity fluctuation along X and Y axis, respectively. (b) TVSS distribution. X and Y are normalized by the upstream diameter ( $D = 14.6$  mm). Principal flow direction is toward the positive X direction. The voxel size for MRI simulation was set to 1 mm. Note the color-maps for the 75% and 90% stenoses are different.

## Supplementary Method

### In-vitro demonstration of 4D Flow MRI with ICOSA encoding

Experimental measurement with 4D Flow MRI with ICOSA encoding was performed to confirm the feasibility of TVSS and BDI quantification. The stenotic phantom for the experiment was a sudden contraction/expansion model with 75% reduction. The upstream diameter without any constriction was 14.6 mm. The inlet and outlet upstream and downstream of the constriction was straight, which had the length of 1m to develop the Poiseuille flow upstream of the stenosis.

The working fluid was a blood analog composed of 26.4:73.6 glycerol/water mixture (by mass). The density and dynamic viscosity of the working fluid were  $1056.2 \text{ kg/m}^3$  and  $2.04 \times 10^{-3} \text{ kg}\cdot\text{m}^{-1}\cdot\text{s}^{-1}$ , respectively. The working fluid was circulated through the flow circuit system at a constant flow rate using a gear pump (ECO Gearchem G6, Pulsafeeder, NY). The flow rate was controlled from 1.31 to 7.61 L/min, which corresponds to Re of 989 to 5724. Re is expressed as  $Re = QD/(\nu A)$ , where Q is the flow rate, D is the diameter of the channel,  $\nu$  is the kinematic viscosity, and A is the cross-sectional area of the channel. The temperature of the fluid during the experiment was 22°C.

4D Flow MRI measurements were performed using a clinical 1.5T MRI scanner (1.5T Philips Achieva, Philips Medical Systems, Best, The Netherlands). A conventional gradient-echo sequence with asymmetric four-point flow encoding was modified to have six-directional icosahedral flow encoding, with one flow-compensated reference encoding. The velocity encoding parameter (VENC) was varied from 100 cm/s to 589 cm/s for the velocity measurements, and from 32 cm/s to 160 cm/s for the turbulence measurements, depending on the flow rate. Echo time and repetition time were 1.93–3.46 ms and 4.17–5.70 ms, respectively. The flip angle was 10°. The field of view was 336 mm × 336 mm × 180 mm with a 1 mm isotropic voxel size. Partial echo acquisition with a factor of 0.725 along the frequency-encoding directions was used, and the reconstructed with the zero-filling.

Three separate scans for each flow condition were measured. The first and second scans were performed with a different VENC to optimize the sensitivity of the velocity and the turbulence measurement, respectively. The third scan was performed with the same scan parameters as the velocity measurement, but with the pump turned off. The velocity field obtained from the third scan was used to correct the velocity offsets caused by background phase errors<sup>1</sup>. Estimation of three velocity components and Reynolds stress from 4D Flow MRI with ICOSA6 encoding is the same as described in the Method sections in main text,

## Reference

1. Petersson, S. *et al.* Quantification of turbulence and velocity in stenotic flow using spiral three-dimensional phase-contrast MRI. *Magnetic resonance in medicine* **75**, 1249-1255 (2016).
